# Supplementary material for: Vacuum-ultraviolet irradiation of pyridine:acetylene ices relevant to Titan astrochemistry
Source: Royal Society of Chemistry journal article supplement (doi:10.1039/d4cp03437f), 2024-01-01
Supplement: d4cp03437f1.zip [file d4cp03437f1.zip]

## Electronic Supplementary Information

### Vacuum-ultraviolet irradiation of pyridine:acetylene ices relevant to Titan astrochemistry

Larissa Lopes Cavalcante,<sup>a</sup> Ellen C. Czaplinski,<sup>b</sup> Helen E. Maynard-Casely,<sup>c</sup> Morgan Cable,<sup>b</sup> Naila Chaouche,<sup>a</sup> Robert Hodyss,<sup>b</sup> Courtney Ennis<sup>a,d\*</sup>

<sup>a</sup> *Department of Chemistry, University of Otago, Dunedin 9054, New Zealand*

<sup>b</sup> *Jet Propulsion Laboratory, California Institute of Technology, Pasadena, California 91109, United States*

<sup>c</sup> *Australian Centre for Neutron Scattering, ANSTO, Kirrawee, New South Wales 2232, Australia*

<sup>d</sup> *MacDiarmid Institute for Advanced Materials and Nanotechnology, Wellington 6140, New Zealand*

\* *courtney.ennis@otago.ac.nz*

#### Table of Contents

Section 1: VUV calibration procedure

Section 2: Supporting tables and figures

Section 3: C<sub>2</sub>H<sub>2</sub> periodic-DFT (CRYSTAL17) output: geometry, frequency, cell energies

Section 4: C<sub>5</sub>H<sub>5</sub>N periodic-DFT (CRYSTAL17) output: geometry, frequency, cell energies

Section 5: C<sub>5</sub>H<sub>5</sub>N-C<sub>2</sub>H<sub>2</sub> co-crystal periodic-DFT (CRYSTAL17) output: geometry, frequency, cell energies

## Section 1: VUV Calibration procedure

The VUV light source calibration procedure was followed according to the previously described method<sup>1</sup>. Briefly, the photoconversion of solid O<sub>2</sub> ice to ozone was monitored using FTIR transmission spectroscopy. The intensity of the strong O<sub>3</sub>  $\nu_3$  band at 1040 cm<sup>-1</sup> ( $A = 1.4 \times 10^{-17}$  cm molecule<sup>-1</sup>) was measured over time following a linear response before IR signal saturation. The flux of VUV photons irradiating the 10 mm radius KBr substrate was calculated to be of the order of  $\sim 10^{12}$  photons cm<sup>-2</sup> s<sup>-1</sup>.

## Section 2: Supporting tables and figures

**Table S1.** IR vibrational bands and respective assignments for the C<sub>5</sub>H<sub>5</sub>N:C<sub>2</sub>H<sub>2</sub> co-crystal and pure phases.

| C <sub>5</sub> H <sub>5</sub> N |                      |                      |                    | C <sub>2</sub> H <sub>2</sub> |                           | Co-crystal                                | $\Delta\nu$<br>between<br>pure<br>and co-<br>crystal | Vibrational<br>modes                                |
|---------------------------------|----------------------|----------------------|--------------------|-------------------------------|---------------------------|-------------------------------------------|------------------------------------------------------|-----------------------------------------------------|
| Hudson et al. 2022              | This work            |                      |                    | Hudson et al. 2014            | This work                 | This work                                 |                                                      |                                                     |
| Amorphous<br>10 K               | Crystalline<br>130 K | Crystalline<br>130 K | Amorphous<br>110 K | Crystalline<br>15 K           | Crystalline<br>70 K       | Crystalline<br>110 K                      |                                                      |                                                     |
|                                 |                      |                      |                    | 3226 (b)                      | 3243<br>(sh)/3227<br>(vs) | 3233                                      | -6                                                   | $\nu_3$ (vCH) <sup>a,b</sup>                        |
|                                 |                      |                      |                    |                               |                           | <b>3178</b><br><b>3143</b><br><b>3085</b> |                                                      | <b>co-crystal<br/>bands</b>                         |
| 3078                            | 3078                 | 3078                 | 3076               |                               |                           | 3080                                      | -4                                                   | $\nu_{11}$ (vCH) <sup>c,d</sup>                     |
| 3051                            | 3055                 | 3054                 | 3050               |                               |                           | 3053                                      | -3                                                   | $\nu_2$ (vCH) <sup>c,d</sup>                        |
|                                 | 3030                 | 3029                 | 3032               |                               |                           | 3032                                      | 0                                                    | $\nu_3$ (vCH) <sup>c,d</sup>                        |
| 3026                            | 3019                 | 3021                 | 3025               |                               |                           | 3026                                      | -1                                                   | $\nu_{12}$ (vCH) <sup>c,d</sup>                     |
| 3002                            |                      |                      |                    |                               |                           | 3004                                      | -2                                                   |                                                     |
| 2989                            | 2996                 | 2996;2987            | 2995               |                               |                           | 2990                                      | -3                                                   | $\nu_{14+4}$ <sup>c</sup>                           |
| 1598                            | 1599                 | 1598                 | 1597               |                               |                           | 1603                                      | -6                                                   | $\nu_{9+10}$ <sup>c</sup>                           |
|                                 |                      |                      |                    |                               |                           | 1598                                      | -1                                                   |                                                     |
| 1582                            | 1580                 | 1580                 | 1581               |                               |                           | 1584                                      | -3                                                   | $\nu_4$ (v ring<br>+ $\delta$ CH) <sup>c,d</sup>    |
|                                 |                      |                      |                    |                               |                           | 1582                                      | -1                                                   |                                                     |
| 1572                            | 1571                 | 1570                 | 1571               |                               |                           | 1571                                      | 0                                                    | $\nu_{13}$ (v ring<br>+ $\delta$ CH) <sup>c,d</sup> |
| 1483                            | 1480                 | 1480                 | 1483               |                               |                           | 1484                                      | -1                                                   | $\nu_5$ (v ring<br>+ $\delta$ CH) <sup>c,d</sup>    |
| 1438                            | 1435                 | 1432                 | 1437               |                               |                           | 1438                                      | -1                                                   | $\nu_{14}$ (v ring) <sup>c,d</sup>                  |

|      |      |            |      |     |     |            |    |                                                        |
|------|------|------------|------|-----|-----|------------|----|--------------------------------------------------------|
|      | 1354 | 1382; 1355 |      |     |     |            |    | $\nu_{15}$ (v ring + $\delta$ CH) <sup>c,d</sup>       |
|      |      |            | 1228 |     |     | 1229       | -1 |                                                        |
| 1218 |      | 1211       | 1217 |     |     | 1217       | 0  | $\nu_{16}$ (v ring + $\delta$ CH) <sup>c,d</sup>       |
|      |      |            |      |     |     | 1212       | 1  |                                                        |
|      |      | 1203       | 1206 |     |     | 1204       | 2  | $\nu_6$ (v ring + $\delta$ CH) <sup>c,d</sup>          |
| 1146 | 1142 | 1141       | 1146 |     |     | 1146       | 0  | $\nu_{17}$ (v ring + $\delta$ CH) <sup>c,d</sup>       |
| 1068 | 1065 | 1065       | 1067 |     |     | 1067       | 0  | $\nu_7$ (v ring + $\delta$ CH) <sup>c,d</sup>          |
|      | -    | 1053       | 1055 |     |     | 1055       | 0  | $\nu_{18}$ (v ring + $\delta$ CH) <sup>c,d</sup>       |
| 1031 | 1031 | 1031       | 1030 |     |     | 1030       | 0  | $\nu_8$ (v ring) <sup>c,d</sup>                        |
| 991  | 991  | 990        | 990  |     |     | 992        | -2 | $\nu_9$ ( $\gamma$ CH) <sup>c,d</sup>                  |
|      |      | 954        | 979  |     |     |            |    | $\nu_{20}$ (v ring) <sup>c,d</sup>                     |
|      |      | 949        | 945  |     |     | 948        | -3 | $\nu_{23}$ ( $\gamma$ CH) <sup>c,d</sup>               |
|      |      | 889        |      |     |     |            |    | $\nu_{24}$ ( $\gamma$ CH) <sup>c,d</sup>               |
|      |      |            |      |     |     | <b>838</b> |    |                                                        |
|      |      |            |      |     |     | <b>820</b> |    | <b>co-crystal bands</b>                                |
|      |      |            |      |     |     | <b>805</b> |    |                                                        |
|      |      |            |      |     |     | <b>788</b> |    |                                                        |
|      |      |            |      | 770 | 769 |            |    | $\nu_5$ ( $\delta$ CH) <sup>a,b</sup>                  |
|      |      |            |      | 761 | 759 |            |    |                                                        |
| 750  | 754  | 754        | 751  |     |     | 750        | 1  | $\nu_{25}$ ( $\gamma$ CH + $\tau$ ring) <sup>c,d</sup> |
|      |      |            |      | 745 | 745 |            |    | $\nu_5$ ( $\delta$ CH) <sup>a,b</sup>                  |
| 705  | 707  | 705        | 705  |     |     | 704        | 1  | $\nu_{26}$ ( $\gamma$ CH + $\tau$ ring) <sup>c,d</sup> |
| 605  | 604  | 603        | 604  |     |     | 605        | -1 | $\nu_{10}$ (v ring) <sup>c,d</sup>                     |

Positive value of  $\Delta\nu$  indicates a redshift; a negative value of  $\Delta\nu$  indicates a blueshift.  $\nu$ , stretching;  $\nu$  ring, in-plane ring deformation;  $\delta$ , bending;  $\gamma$ , wagging;  $\tau$ , out-of-plane ring deformation. <sup>a</sup>Hudson et al., 2014<sup>2</sup>; <sup>b</sup>Bottger & Eggers, 1964<sup>3</sup>; <sup>c</sup>Castellucci et al., 1969<sup>4</sup>; <sup>d</sup>Urena et al., 2003<sup>5</sup>.

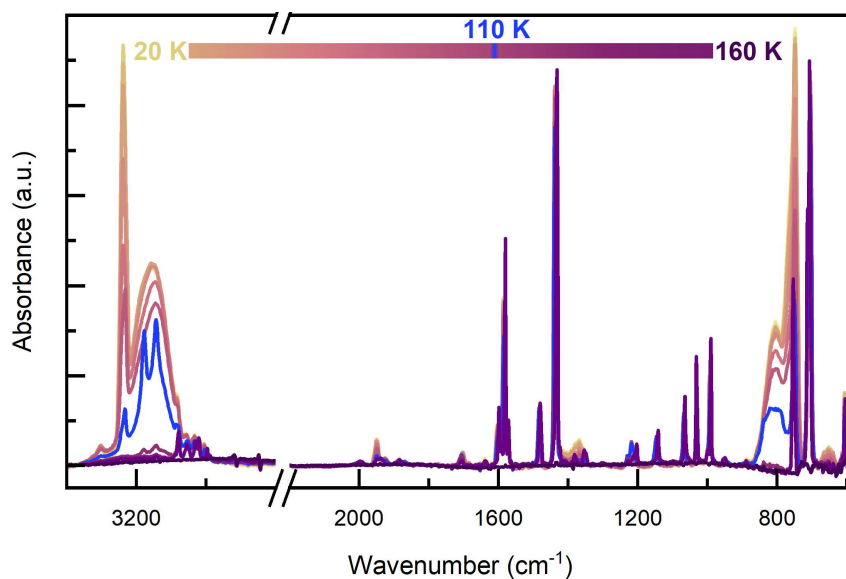

**Figure S1.** Temperature ramp from 20 to 160 K showing the progressive co-crystal formation at 110 K, with 10 K steps between each spectrum. At base temperature, the spectrum is characterized by the presence of a broad band in the CH stretch region, centered at  $3152\text{ cm}^{-1}$ , and a shoulder around  $810\text{ cm}^{-1}$  developing to the  $889\text{ cm}^{-1}$  CH wagging mode of  $\text{C}_5\text{H}_5\text{N}$ , both indicating an interaction between acetylene and pyridine. At 110 K, co-crystallization is observed as indicated by the broad band CH band becoming resolved and splitting into two bands at  $3178$  and  $3142\text{ cm}^{-1}$ , corresponding to coupled CH stretching modes of pyridine and acetylene. The shoulder at  $810\text{ cm}^{-1}$  becomes more resolved into a structured broad band, corresponding to the coupled bending modes of acetylene and pyridine within the co-crystal.

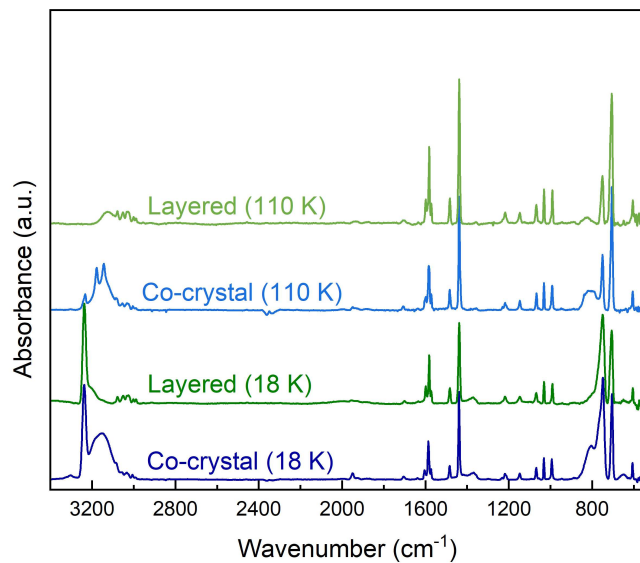

**Figure S2.** Stack plot of co-crystal (blue) and layered ices (green) between pyridine and acetylene. For the layered ice, the acetylene was deposited on top of pyridine, following the condensation profile of gases in Titan's atmosphere<sup>6</sup>, and assuming pyridine condensation at a similar altitude to benzene. The absence of the strong features that characterize the co-crystal formation in the spectrum for the layered ice indicates poor interaction between the two species, being restricted to the interface between the two ice layers. At 110 K, the persistence of broad bands at 3125 and 824 cm<sup>-1</sup> indicates that the remaining acetylene molecules in the ice are interacting with pyridine but without a preferred orientation, i.e. co-crystal formation.

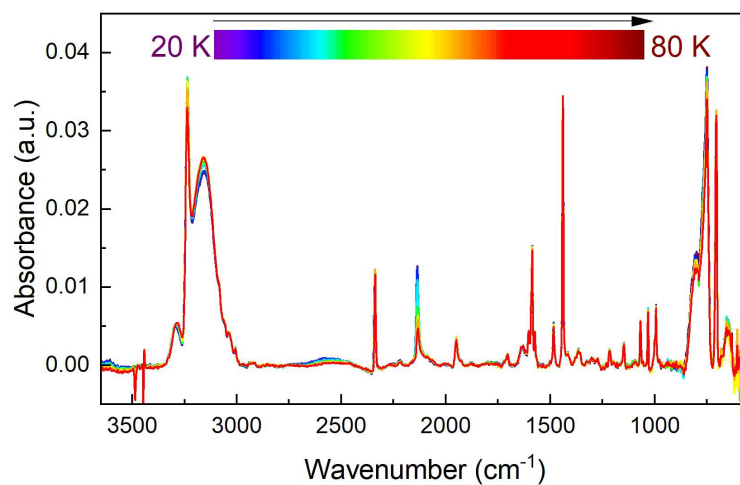

**Figure S3.** Infrared spectra recorded during temperature ramp between 20 and 80 K after irradiation of the mixed ice at 18 K.

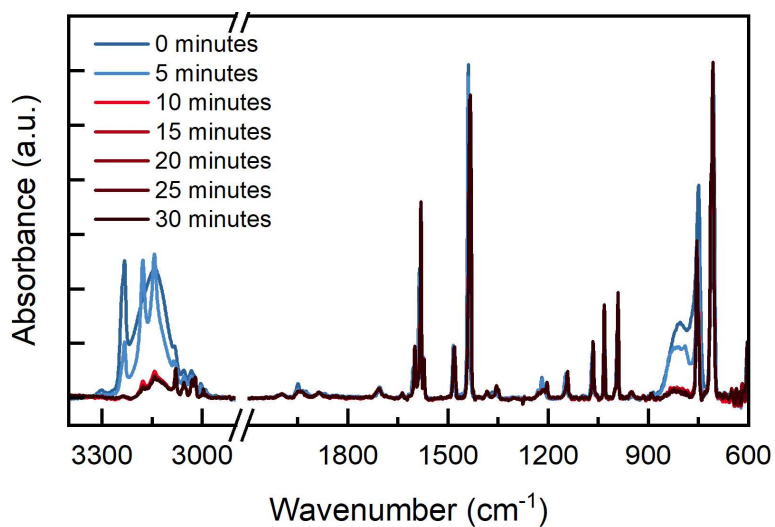

**Figure S4.** Stability of the co-crystal after formation at 110 K. Within 30 minutes, the bands associated with the co-crystal formation considerably deplete, resulting from the instability caused by the desorption of acetylene at those temperatures and under vacuum.

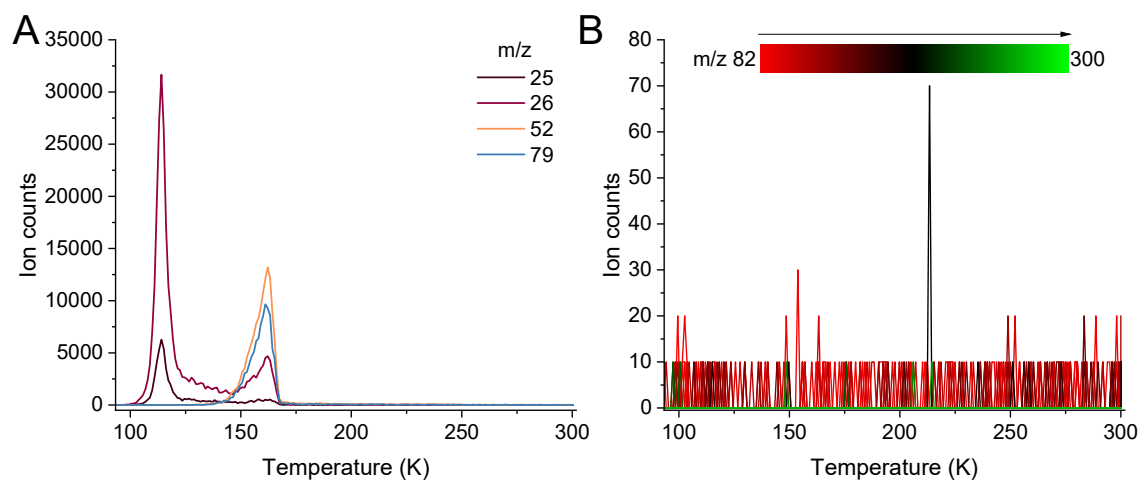

**Figure S5:** Ion counts for the co-crystal irradiated at 90 K. (A) Parent molecules:  $m/z$  25 and 26 ( $\text{C}_2\text{H}^+$  and  $\text{C}_2\text{H}_2^+$ );  $m/z$  52 and 79 ( $\text{C}_4\text{H}_4^+$  and  $\text{C}_5\text{H}_5\text{N}^+$ ). (B) Ion counts for masses between  $m/z$  82 and 300. Occasional spikes were considered noise.

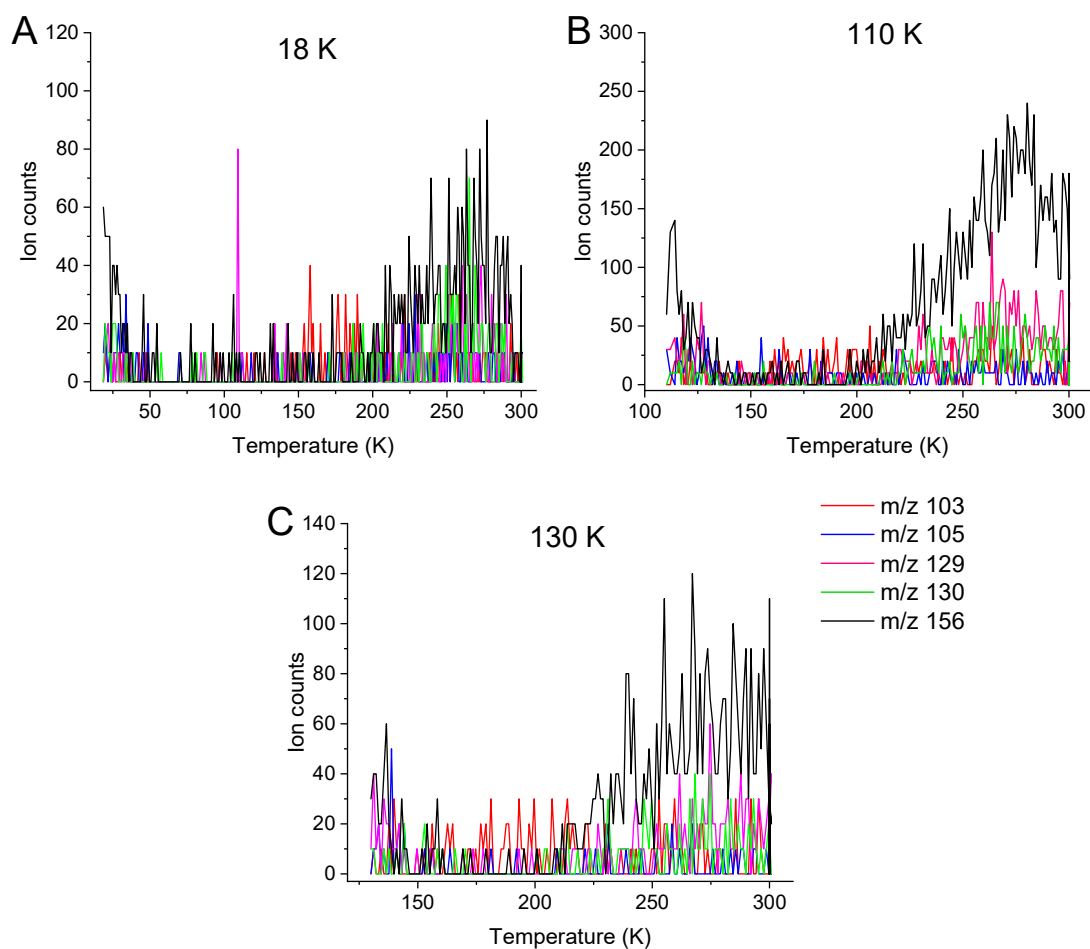

**Figure S6:** Ion counts for target ions evaluated throughout by TPD until 300 K for the pure pyridine ices irradiated for 48 h at: (A) 18 K, (B) 110 K and (C) 130 K. Overall, the most abundant specie has m/z 156, indicating the formation of bipyridine structures, and desorbs from ~200 K. Only trace levels of m/z 103, 129 and 130 detected and an absence of m/z 105 above the noise threshold.

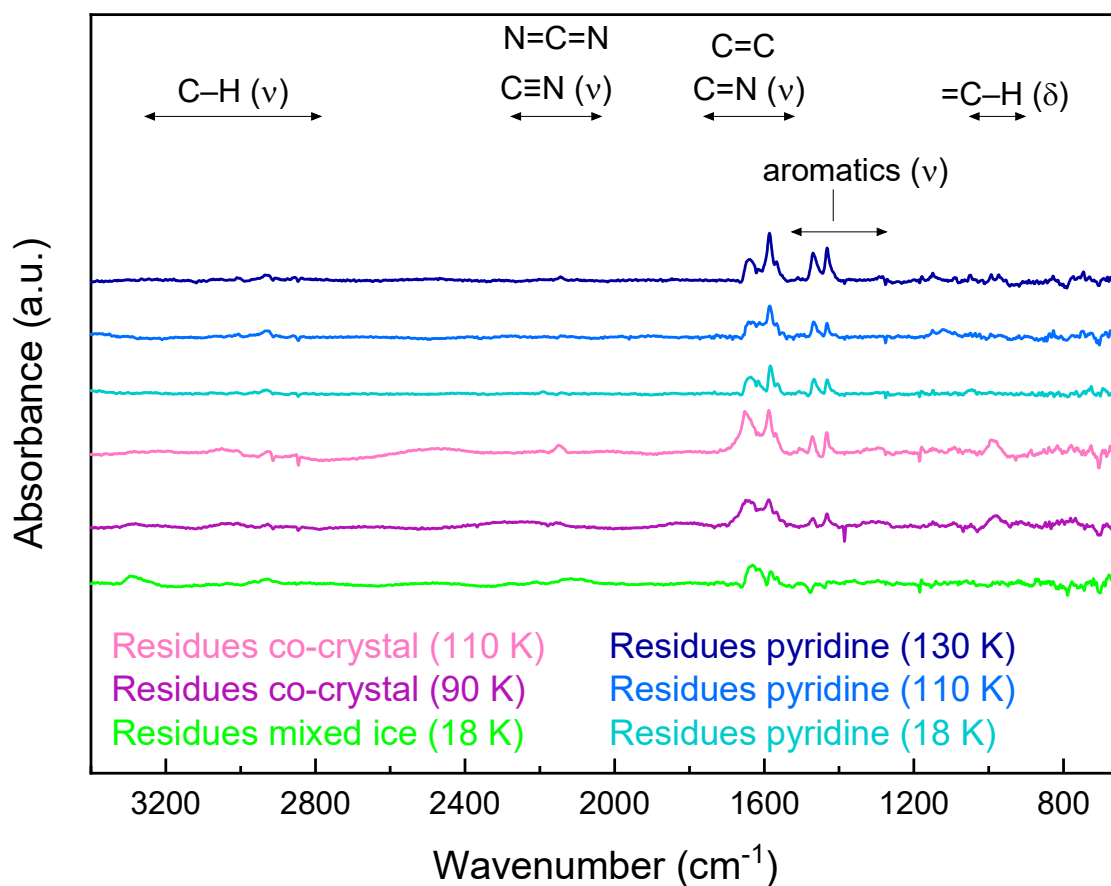

**Figure S7.** Stacked spectra of the non-volatile residues formed after 48 h irradiation of the pure  $\text{C}_5\text{H}_5\text{N}$  and mixed ices between  $\text{C}_5\text{H}_5\text{N}$  and  $\text{C}_2\text{H}_2$ , followed by temperature ramp to 300 K. The residues formed within the co-crystals irradiated at 90 (purple) and 110 K (pink) are the same, also showing strong similarities with the mixed ice irradiated at 18 K (green) and pure  $\text{C}_5\text{H}_5\text{N}$  ices irradiated at 18 (cyan), 110 (light blue) and 130 K (dark blue). The region of the vibrational modes was assigned based on previous studies<sup>7</sup>.  $\nu$  = stretching;  $\delta$  = bending.

## References

1. P. A. Gerakines, M. H. Moore and R. L. Hudson, *Astronomy and Astrophysics*, 2000, **357**, 793-800.
2. R. L. Hudson, R. F. Ferrante and M. H. Moore, *Icarus*, 2014, **228**, 276-287.
3. G. L. Bottger and D. F. Eggers, *The Journal of Chemical Physics*, 1964, **40**, 2010-2017.
4. E. Castellucci, G. Sbrana and F. D. Verderame, *The Journal of Chemical Physics*, 1969, **51**, 3762-3770.
5. F. P. Ureña, M. F. Gómez, J. J. L. González and E. M. n. Torres, *Spectrochimica Acta Part A: Molecular and Biomolecular Spectroscopy*, 2003, **59**, 14.
6. E. L. Barth, *Planetary and Space Science*, 2017, **137**, 20-31.
7. E. Hirai, Y. Sekine, N. Zhang, N. Noda, S. Tan, Y. Takahashi and H. Kagi, *Geophysical Research Letters*, 2023, **50**.
